# Supplementary material for: Preparation and enhanced supercapacitance performance of porous carbon spheres with a high degree of graphitization
Source: Royal Society of Chemistry journal article supplement (doi:10.1039/c4ra09204j), 2014-11-26
Supplement: c4ra09204j1.pdf [file c4ra09204j1.pdf]

## Supporting Information

### **Preparation and enhanced supercapacitance performance of porous carbon spheres with a high graphitization degree**

Binbin Chang\*<sup>1</sup>, Baocheng Yang<sup>1</sup>, Yanzhen, Guo<sup>1</sup>, Yiliang Wang<sup>2</sup>, Xiaoping Dong\*<sup>2</sup>

<sup>1</sup> Institute of Nanostructured Functional Materials, Huanghe Science and Technology College, Zhengzhou, Henan 450006, China

<sup>2</sup> Department of Chemistry, School of Sciences, Zhejiang Sci-Tech University, 928 Second Avenue, Xiasha Higher Education Zone, Hangzhou 310018, China

\*Corresponding author. E-mail: [changbinbin806@163.com](mailto:changbinbin806@163.com) (B. Chang)  
[xpdong@zstu.edu.cn](mailto:xpdong@zstu.edu.cn) (X. Dong)

Fax: +86 571 86843228; Tel: +86 571 86843228;

**Table S1** The comparison of specific capacitances of GPCS-9 with other porous carbon materials

| Materials                                | $S_{BET}$<br>( $\text{m}^2 \text{g}^{-1}$ ) | Capacitance<br>( $\text{F g}^{-1}$ ) | Electrolyte                   | Scan rate              | Ref. |
|------------------------------------------|---------------------------------------------|--------------------------------------|-------------------------------|------------------------|------|
| GPCS-9                                   | 1103.4                                      | 127.4                                | 2M KOH                        | $0.2 \text{ A g}^{-1}$ | –    |
| CMK-3                                    | 1070.4                                      | 108.2                                | 2M KOH                        | $0.2 \text{ A g}^{-1}$ | –    |
| PCS                                      | 935.9                                       | 40.5                                 | 2M KOH                        | $0.2 \text{ A g}^{-1}$ | –    |
| CS900                                    | 952.5                                       | 33.5                                 | 1 M $\text{H}_2\text{SO}_4$   | $5 \text{ mV s}^{-1}$  | 1    |
| HOPC-g-1000                              | 296                                         | 73.4                                 | 6M KOH                        | $3 \text{ mV s}^{-1}$  | 2    |
| Carbon nanofibers<br>from phenolic resol | 1176                                        | 98                                   | 0.5 M $\text{H}_2\text{SO}_4$ | $1 \text{ A g}^{-1}$   | 3    |
| CNFs-900                                 | 348.1                                       | 10                                   | 6M KOH                        | $1 \text{ A g}^{-1}$   | 4    |
| N-CNFs-700                               | 378.7                                       | 75                                   | 6M KOH                        | $1 \text{ A g}^{-1}$   | 4    |

#### References

- 1 V. G. Pol, L. K. Shrestha, K. Ariga, *ACS Appl. Mater. Interfaces*, 2014, **6**, 10649–10655.
- 2 C. H. Huang, Q. Zhang, T. C. Chou, C. M. Chen, D. S. Su, R. A. Doong, *ChemSusChem*, 2012, **5**, 563–571.
- 3 H. J. Liu, X. M. Wang, W. J. Cui, Y. Q. Dou, D. Y. Zhao, Y. Y. Xia, *J. Mater. Chem.*, 2010, **20**, 4223–4230.
- 4 L. F. Chen, X. D. Zhang, H. W. Liang, M. G. Kong, Q. F. Guan, P. Chen, Z. Y. Wu, S. H. Yu, *ACS Nano*, 2012, **6**, 7092–7102.
